# Supplementary material for: Tracing the Origin of Planktonic Protists in an Ancient Lake
Source: Preprints.org preprint supplement (doi:10.20944/preprints201912.0401.v1), 2019-12-31
Supplement: Supplementary file 2 [file supplementary]

Monodofilosa

Cryomonadida

Thecofilosea

Mataza-like

Thaumatomonadida

Cercomonadida

Sarcomonadea

Pansomonadida

Glissomonadida

Novel Clade 10

Endomixa

Spongomonadida

Tremulida

Granofilosea

0.4
