# Supplementary material for: Tracing the Origin of Planktonic Protists in an Ancient Lake
Source: Preprints.org preprint supplement (doi:10.20944/preprints201912.0401.v1), 2019-12-31
Supplement: Supplementary file 5 [file supplementary]

# Chrysophyceae and Synurophyceae like

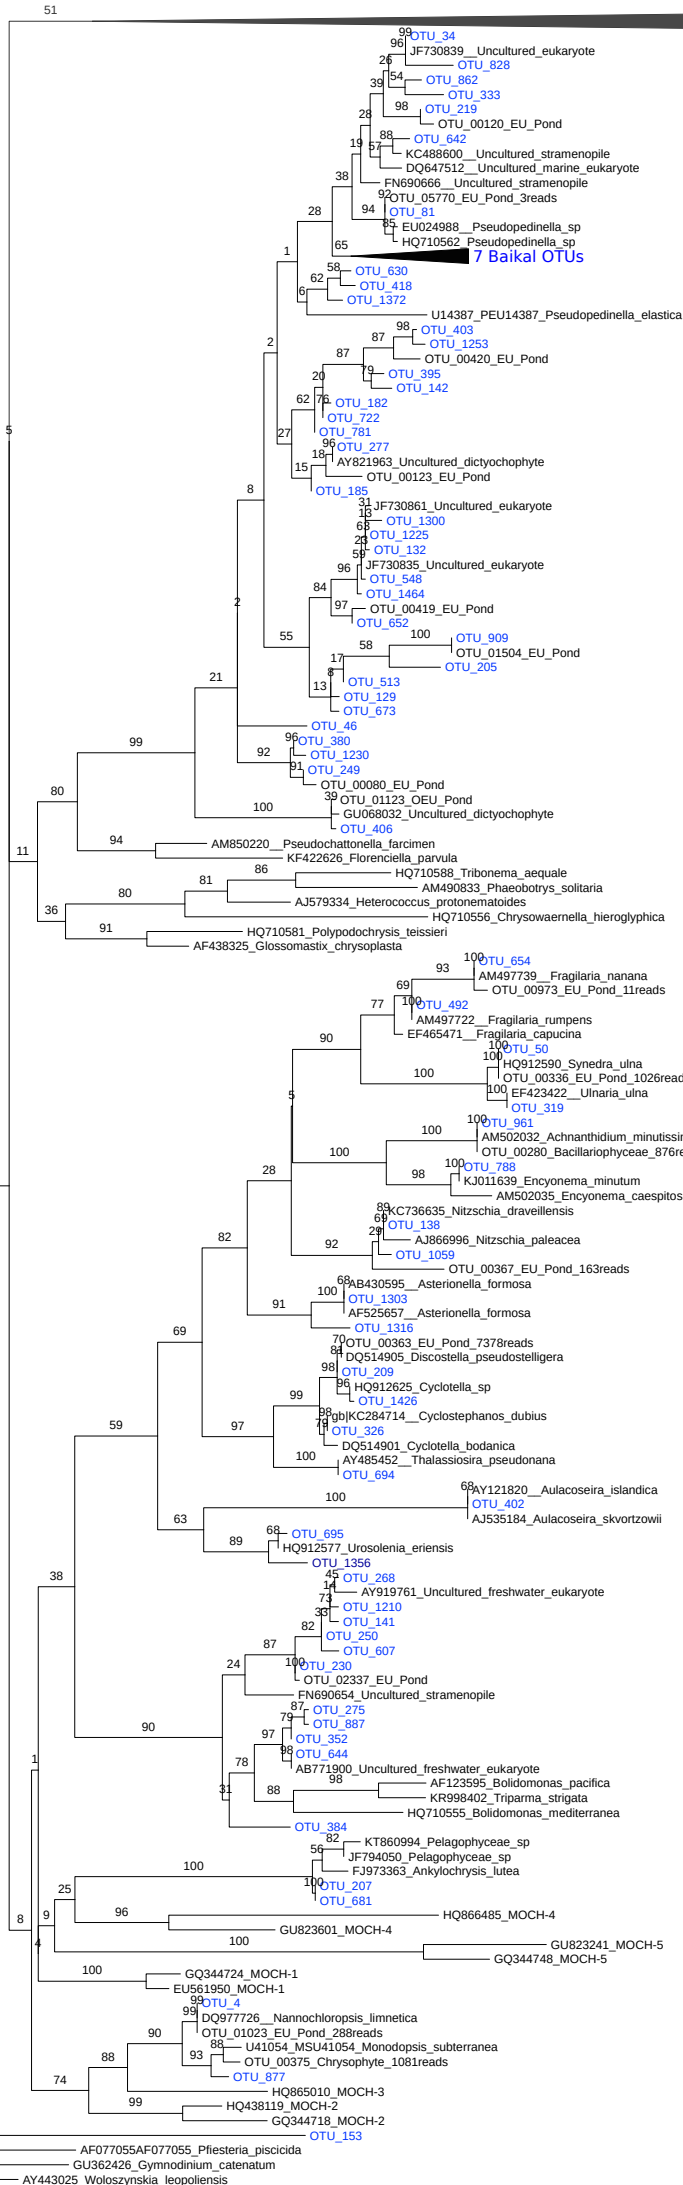

## Dictyochophyceae

## Xanthophyceae Pinguiophyceae

## Bacillariophyceae

## Bolidophyceae

## Pelagophyceae

## MOCH-4 MOCH-5

## Eustigmatophyceae
