# Supplementary material for: Tracing the Origin of Planktonic Protists in an Ancient Lake
Source: Preprints.org preprint supplement (doi:10.20944/preprints201912.0401.v1), 2019-12-31
Supplement: Supplementary file 8 [file supplementary]

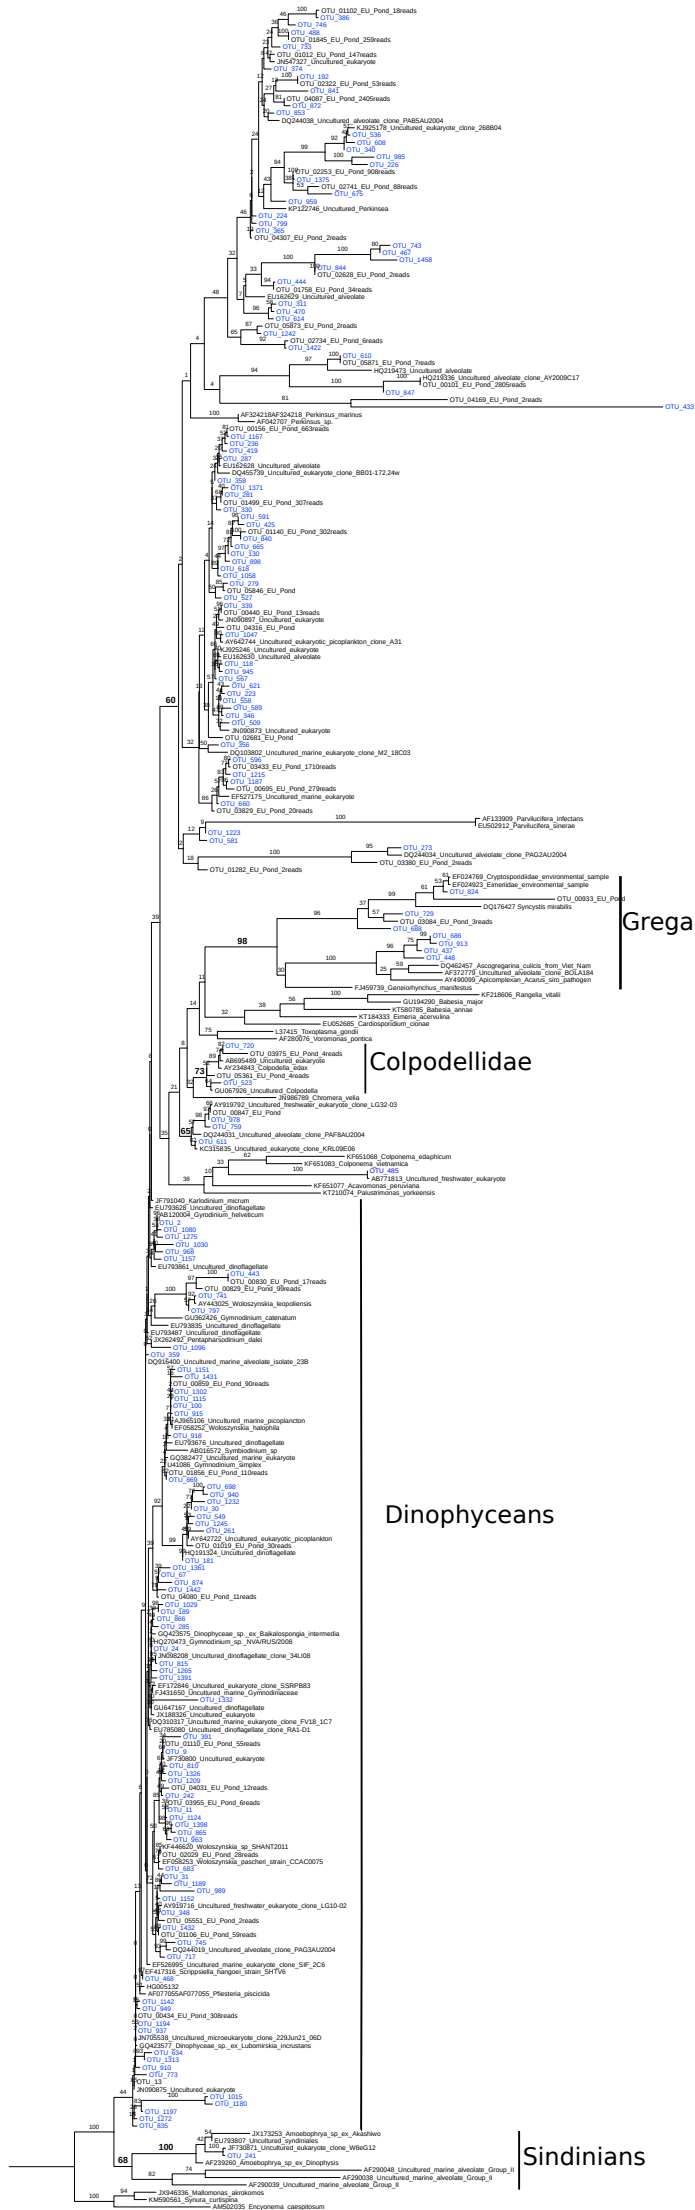

Perkinsiids

Gregarinasina

Apicomplexa  
and their ancestors

Colpodellidae

Dinophyceans

Sindinians
