# Supplementary material for: Tracing the Origin of Planktonic Protists in an Ancient Lake
Source: Preprints.org preprint supplement (doi:10.20944/preprints201912.0401.v1), 2019-12-31

## Ichtyosporea

## Choanoflagellida

## Craspedida

## Chytridiomycota

## Aphelids

## Basidiomycota

## Ascomycota

## Cryptomycota

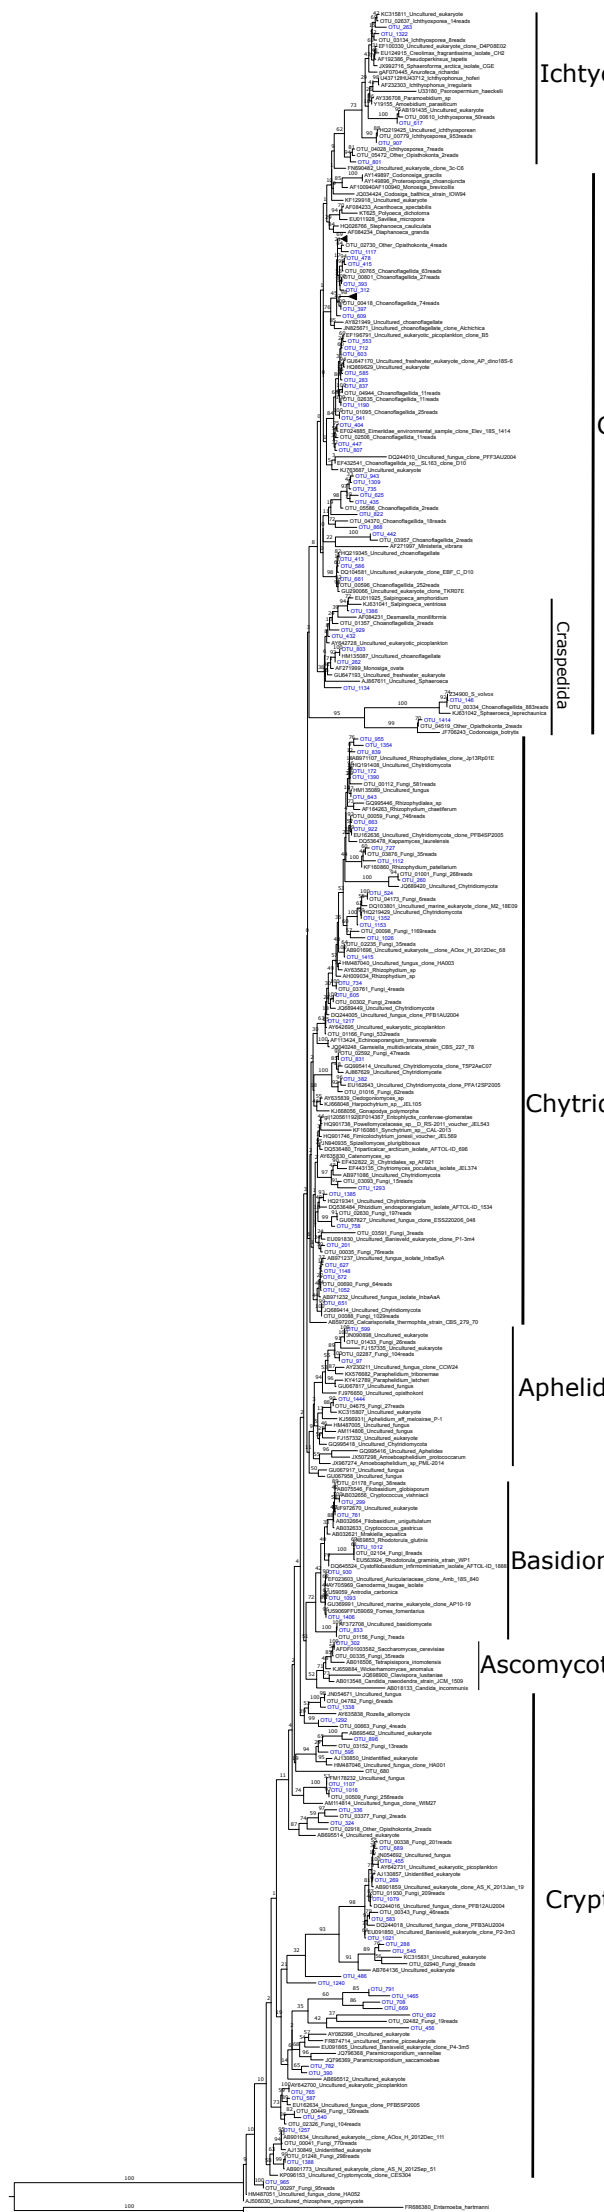

Supplement: Supplementary file 9 [file supplementary]
