# Supplementary figures and images for: Tracing the Origin of Planktonic Protists in an Ancient Lake
Source: Preprints.org preprint supplement (doi:10.20944/preprints201912.0401.v1), 2019-12-31

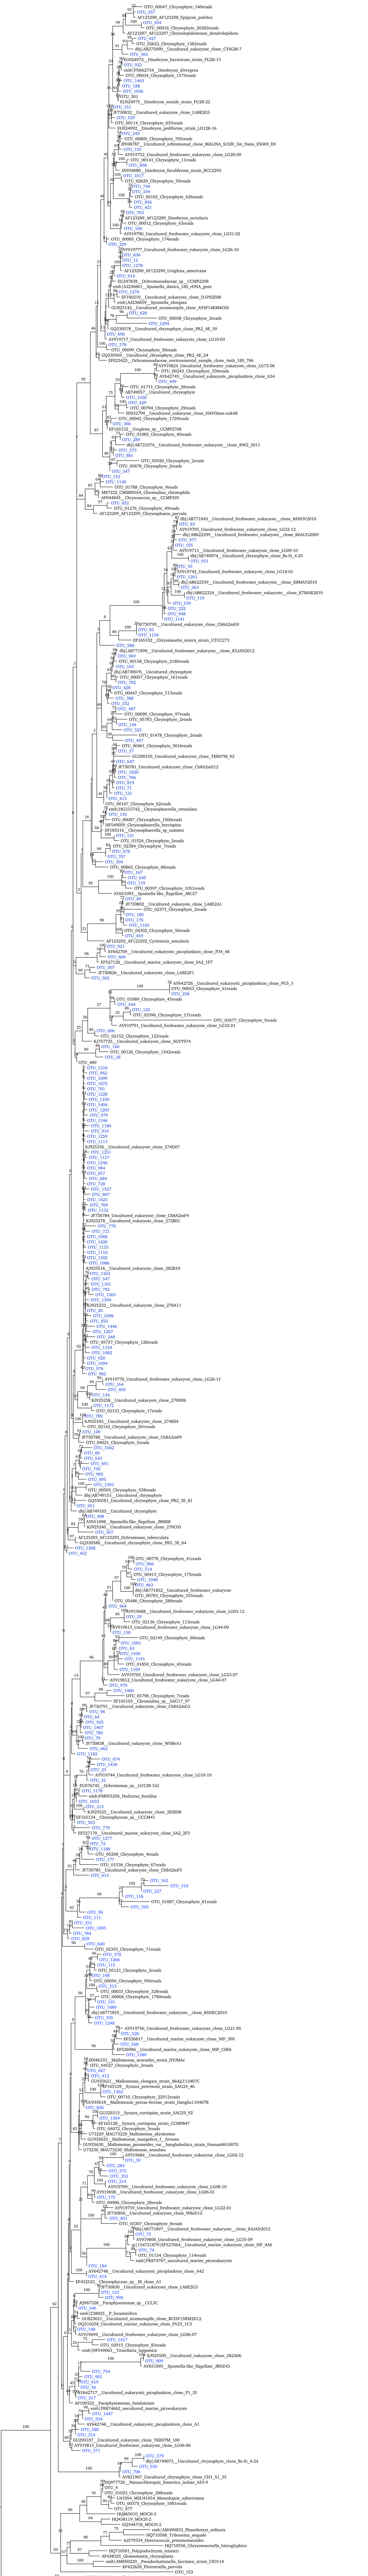

Supplement: Supplementary file 1 [file supplementary]

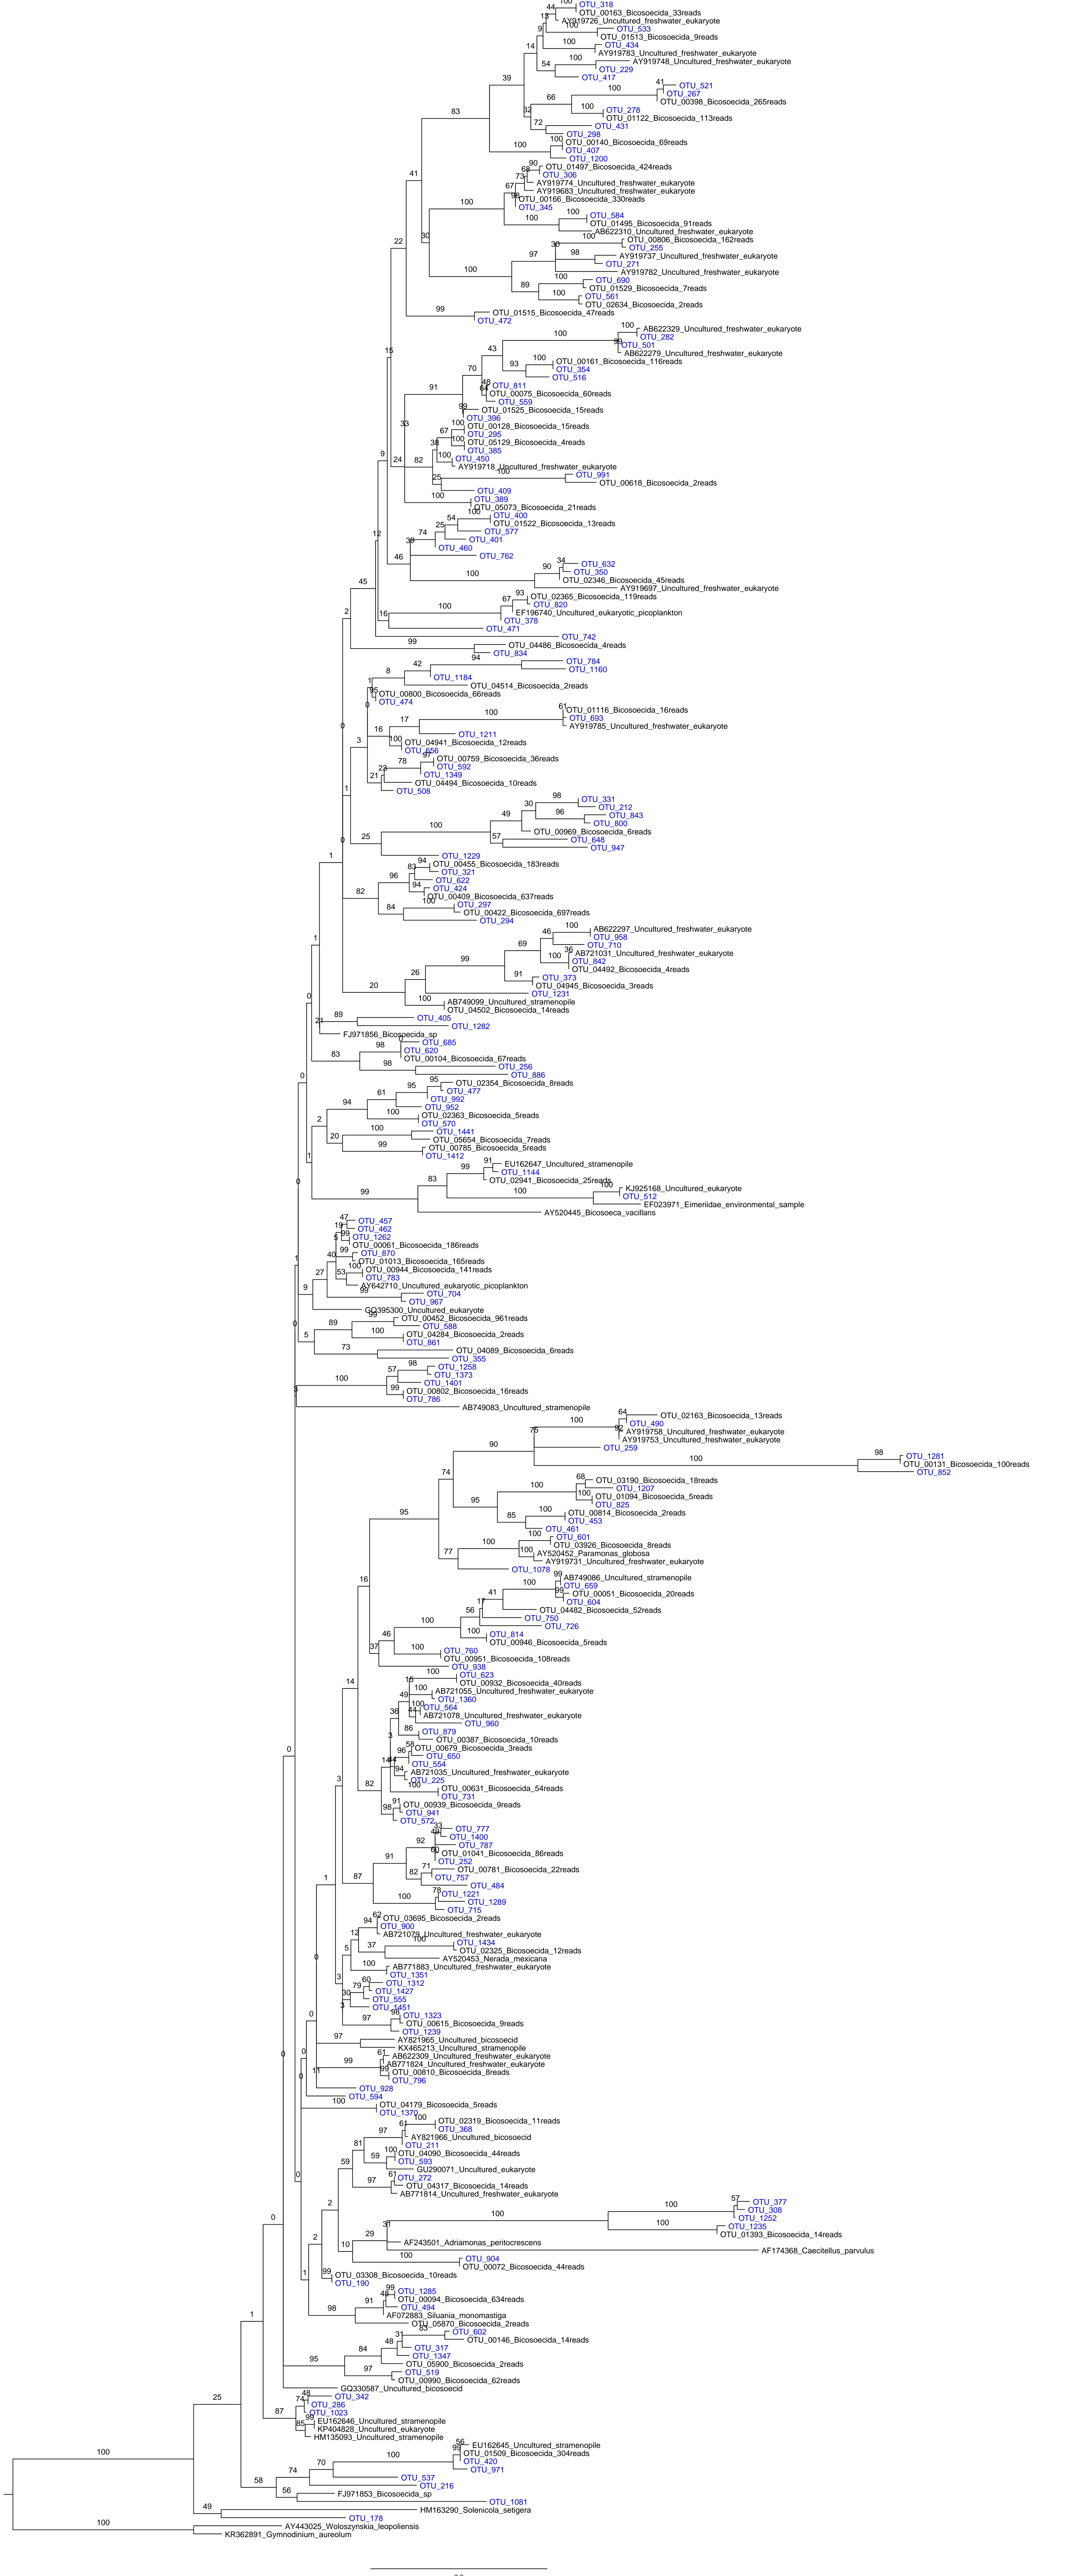

Supplement: Supplementary file 4 [file supplementary]

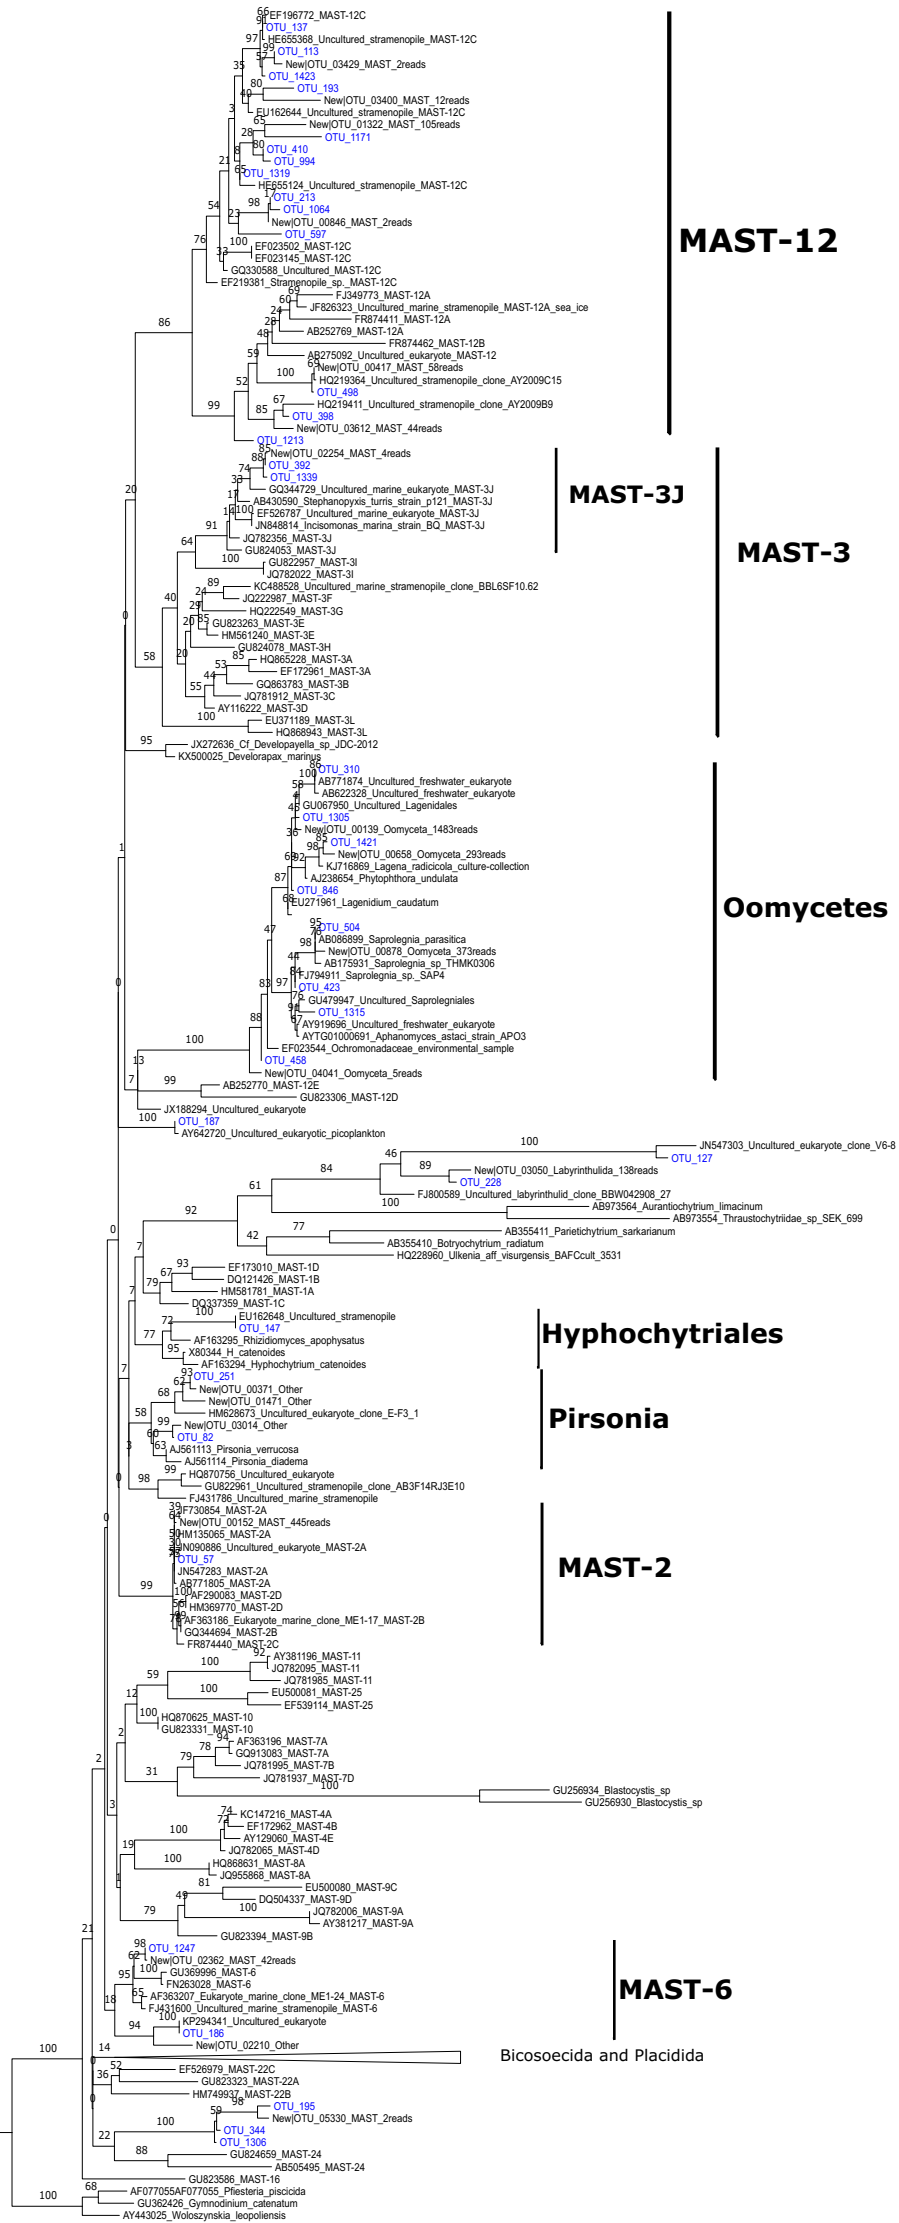

Supplement: Supplementary file 6 [file supplementary]

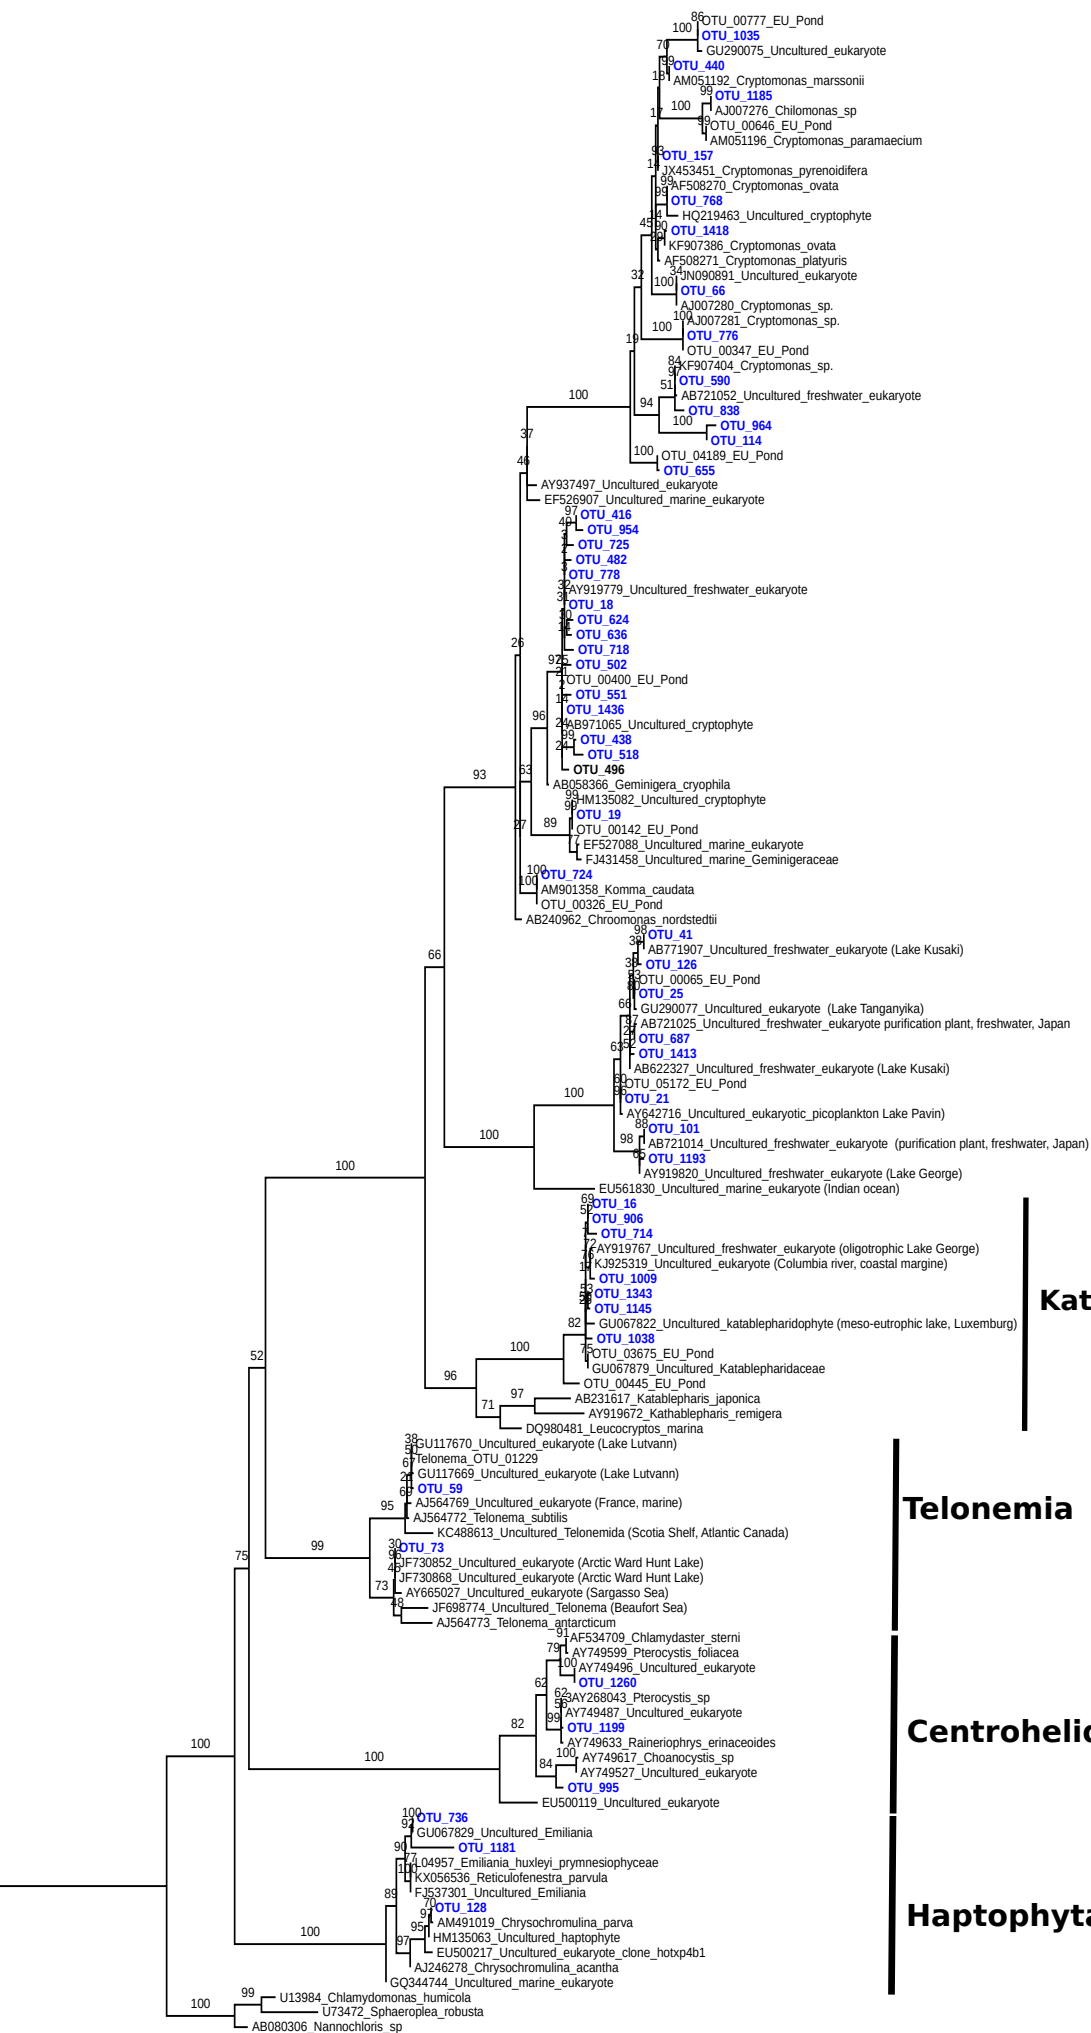

Supplement: Supplementary file 10 [file supplementary]
